# Supplementary material for: SDF-1α-induced dual pairs of E-selectin/ligand mediate endothelial progenitor cell homing to critical ischemia
Source: PubMed Central journal article supplement (PMC5054375; doi:10.1038/srep34416), 2016-10-07
Supplement: srep34416-s1.pdf [file srep34416-s1.pdf]

# **SDF-1 $\alpha$ -induced dual pairs of E-selectin/ligand mediate endothelial progenitor cell homing to critical ischemia**

Zhao-Jun Liu<sup>1</sup>, Runxia Tian<sup>1</sup>, Yan Li<sup>1</sup>, Leiming Zhang<sup>1,2</sup>, Hongwei Shao<sup>1</sup>, Cuixia Yang<sup>1,3</sup>, and Omaid C. Velazquez<sup>1,\*</sup>

<sup>1</sup> Department of Surgery, University of Miami School of Medicine, Miami, 33136, USA

<sup>2</sup> Yantai University, School of Pharmacy, Shandong 264005, China

<sup>3</sup> Department of Molecular Biology Laboratory, Shanghai Sixth People's Hospital, Shanghai Jiaotong University, Shanghai, 200233, China

\* Corresponding author

# Supplemental Table I

## Fold changes of gene expression upon SDF-1 $\alpha$ stimulation in human EPC

| <i>Gene name</i>                                           |   | <i>Fold change</i> |
|------------------------------------------------------------|---|--------------------|
| Collagen, type XII, alpha 1                                | + | 2.64               |
| Collagen, type VII, alpha 1                                | + | 3.12               |
| Versican                                                   | + | 3.61               |
| Catenin                                                    | + | 5.10               |
| Integrin, alpha 2                                          | + | 2.27               |
| Integrin, alpha 3                                          | + | 2.22               |
| Integrin, alpha 4                                          | + | 3.71               |
| Integrin, alpha V                                          | + | 3.71               |
| Integrin, beta 1                                           | + | 5.66               |
| Laminin, alpha 3                                           | + | 2.66               |
| Laminin, beta 3                                            | + | 97.68              |
| Laminin, gamma 1                                           | + | 2.04               |
| Matrix metalloproteinase 1                                 | + | 3.63               |
| Matrix metalloproteinase 10                                | + | 3.14               |
| Matrix metalloproteinase 12                                | + | 8.82               |
| Selectin E                                                 | + | 3.48               |
| Sarcoglycan, epsilon                                       | + | 2.36               |
| Secreted phosphoprotein 1                                  | + | 5.17               |
| Transforming growth factor, beta-induced, 68kDa            | + | 2.06               |
| Thrombospondin 1                                           | + | 4.44               |
| Thrombospondin 2                                           | + | 3.76               |
| Tenascin C                                                 | + | 3.34               |
| ADAM metalloproteinase with thrombospondin type 1 motif, 1 | - | 2.51               |
| Integrin, alpha 8                                          | - | 2.07               |
| Matrix metalloproteinase 9                                 | - | 2.39               |

# Supplemental Figure 1

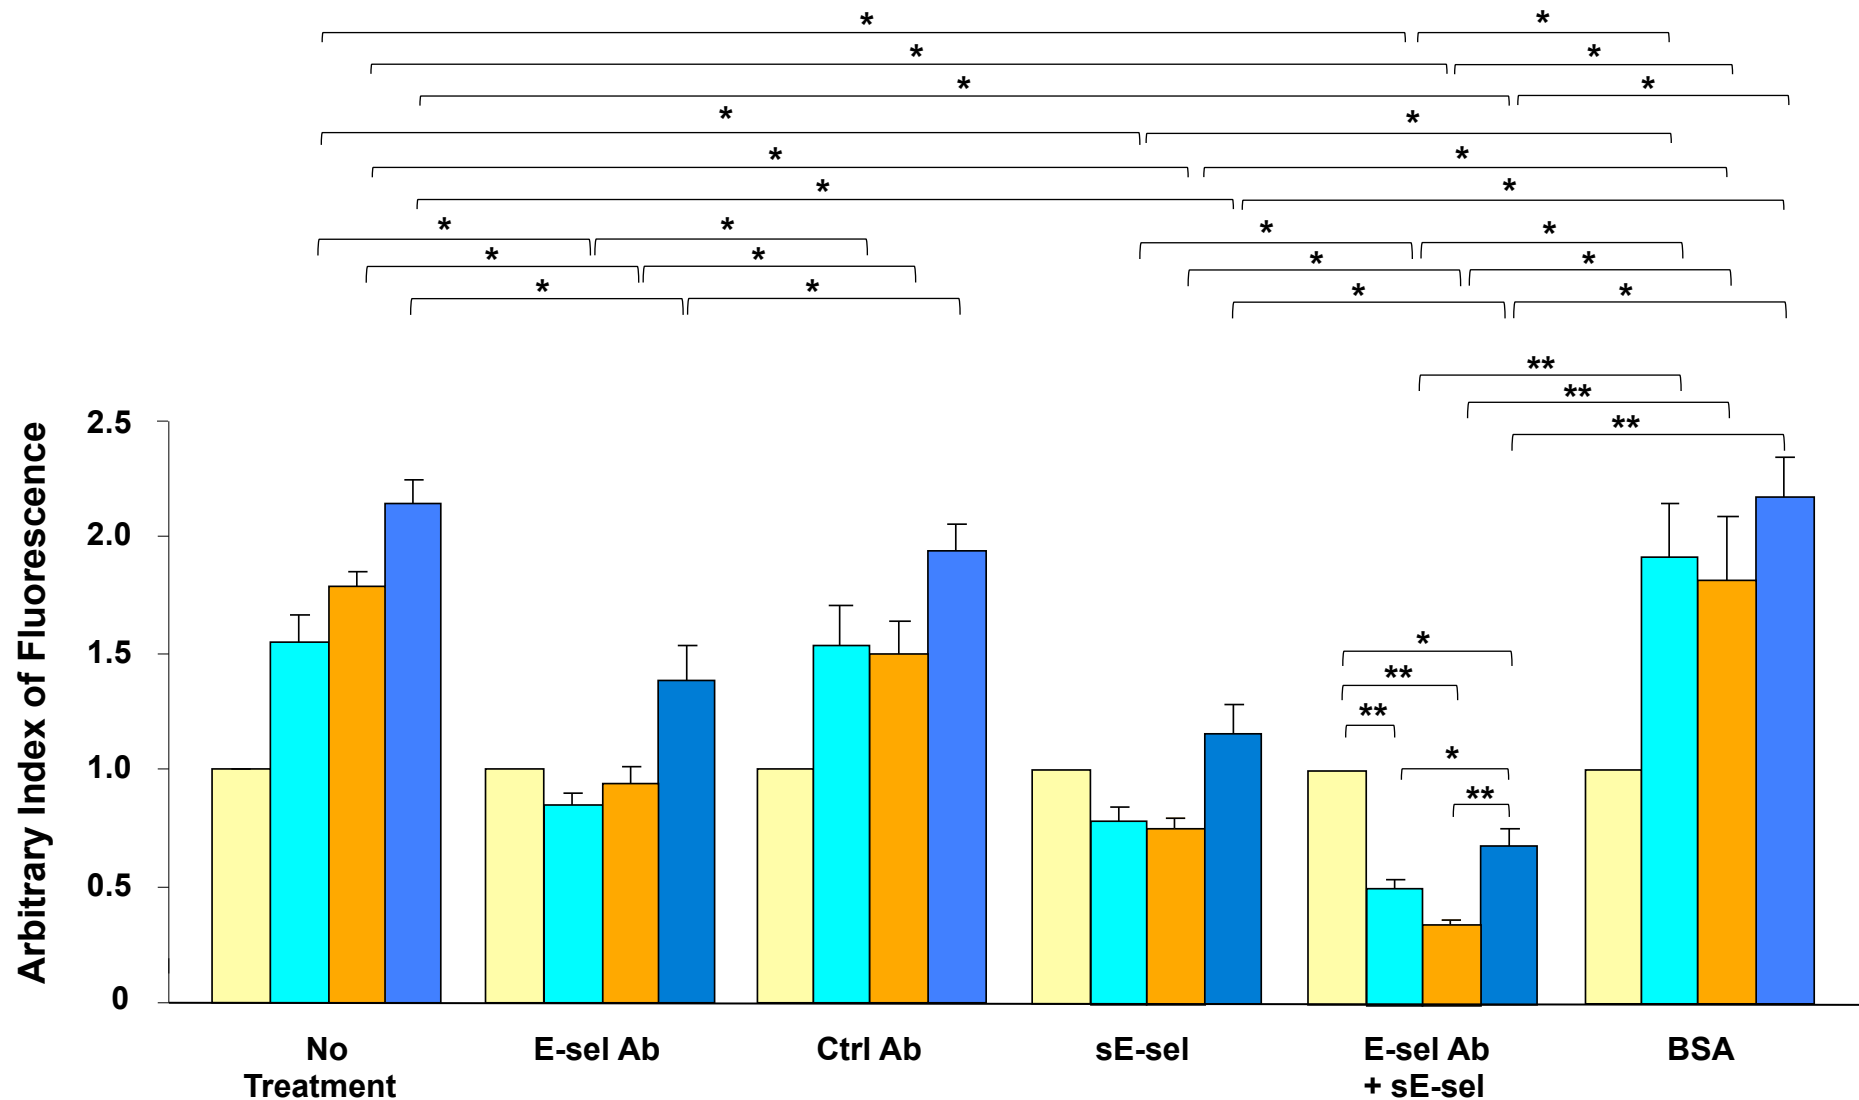

**SDF-1 $\alpha$ -induced E-selectin/ligands are responsible for mediating EC-EPC adhesion *in vitro*.** SDF-1 $\alpha$  increases adhesion of Dil-Ac-LDL<sup>+</sup> human EPC to the HMVEC monolayer. Single or combined treatment of SDF-1 $\alpha$ -stimulated HMVEC monolayers with sE-sel or treatment of SDF-1 $\alpha$ -stimulated Dil-Ac-LDL<sup>+</sup> EPC with E-selectin-neutralizing Ab can significantly inhibit EPC-HMVEC interaction. See Fig. 3 for the details of 4 combinations of EPC-HMVEC interactions and ANOVA test. \*  $P < 0.05$ ; \*\*  $P < 0.01$ .
